# Supplementary material
Source: MDPI journal article supplement (https://www.mdpi.com/2079-9276/12/10/123)
Supplement: s1 [file s1]

## Supplementary Materials

### The impact of biosolids biochar on biomethane production from the anaerobic digestion of chicken manure

#### Supplementary Figures

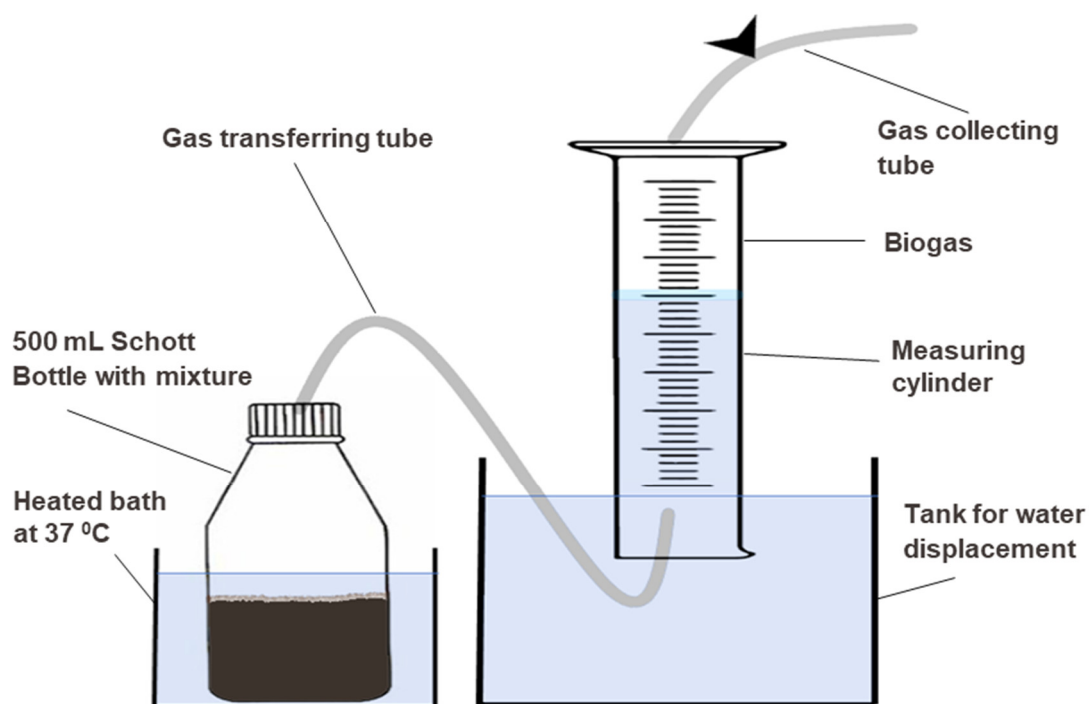

**Figure S1.** Experimental design of the anaerobic digestion of chicken manure.

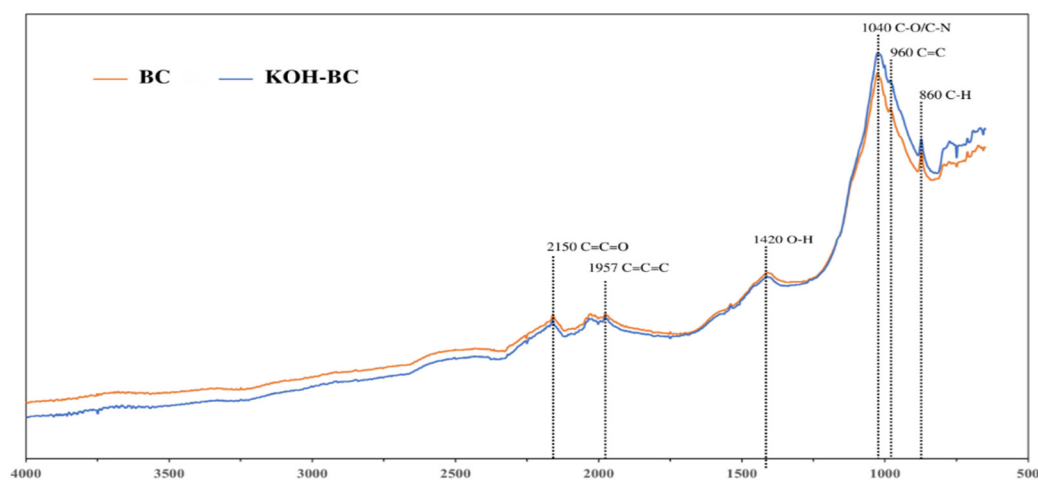

**Figure S2.** Fourier Transformed Infrared (FTIR) spectra of biosolids biochar (BC) and modified biochar (KOH-BC).

Change in TAN (mg L<sup>-1</sup>) = TAN at day 18 (mg L<sup>-1</sup>) – TAN at day 0 (mg L<sup>-1</sup>)

TAN Reduction (%) = [(TAN<sub>control</sub> at day 18 – TAN<sub>biochar treatments</sub> at day 18)/ TAN<sub>control</sub> at day 18] x100

**Figure S3.** Change in Tan (mg L<sup>-1</sup>) and TAN Reduction (%) equations.

## Supplementary Tables

**Table S1.** The mass and volume of materials added to digesters with different treatments.

| Treatment                                                     | Feedstock (g) | Inoculum (ml) | Biochar (g) | Milli-Q water (ml) |
|---------------------------------------------------------------|---------------|---------------|-------------|--------------------|
| Chicken manure, Sludge (No biochar)                           | 42            | 229           | -           | 18.5               |
| Chicken manure, Sludge, and Biosolids biochar (BC)            | 42            | 229           | 21          | 158.4              |
| Chicken manure, Sludge, and alkali biosolids biochar (KOH-BC) | 42            | 229           | 21          | 158.4              |

**Table S2.** The main surface functional groups of biosolids biochar (BC) and modified biochar (KOH-BC) identified from FTIR spectra.

| Waveband (cm <sup>-1</sup> ) | Functional group   |
|------------------------------|--------------------|
| 2150                         | C≡C≡O stretching   |
| 1900-2000                    | C=C=C stretching   |
| 1330-1420                    | O-H bending        |
| 1040-1050                    | CO-O-CO stretching |
| 1020-1250                    | C-N stretching     |
| 960-980                      | C=C bending        |
| 860-900                      | C-H bending        |
